## Cancer and Infective endocarditis: diagnosis and prognostic impact. Results of the ESC-EORP EURO-ENDO (European infective endocarditis) registry: a prospective cohort study

B. Cosyns<sup>1</sup>, B. Roosens<sup>1</sup>, P. Lancellotti<sup>2</sup>, S. Marchetta<sup>2</sup>, V. Scheggi<sup>3</sup>, I. Vilacosta<sup>4</sup>, A. Pasquet<sup>5</sup>, C. Piper<sup>6</sup>, G. Reyes<sup>7</sup>, E. Mahfouz<sup>8</sup>, Z. Kobalava<sup>9</sup>, L. Piroth<sup>10</sup>, J.D. Kasprzak<sup>11</sup>, B. Iung<sup>12</sup>, G. Habib<sup>13</sup>

<sup>1</sup>Free University of Brussels (VUB), Brussels, Belgium; <sup>2</sup>University Hospital of Liege (CHU), Liege, Belgium; <sup>3</sup>Careggi University Hospital, Florence, Italy; <sup>4</sup>Complutense University of Madrid, Madrid, Spain; <sup>5</sup>Clínicas Saint-Luc UCL, Brussels, Belgium; <sup>6</sup>Herz- und Diabeteszentrum NRW, Ruhr-Universität Bochum, Bad Oeynhausen, Germany; <sup>7</sup>Hospital El Cruce, Buenos Aires, Argentina; <sup>8</sup>Mansoura University, Mansoura, Egypt; <sup>9</sup>Peoples Friendship University of Russia (RUDN University), Moscow, Russian Federation; <sup>10</sup>University Hospital Center, Dijon, France; <sup>11</sup>Medical University of Lodz, Lodz, Poland; <sup>12</sup>Hospital Bichat-Claude Bernard, Paris, France; <sup>13</sup>APHM La Timone Hospital, Marseille, France  
On behalf of ESC-EORP EURO-ENDO

**Funding Acknowledgement:** Type of funding source: Private company. Main funding source(s): Pharmacological.

**Background:** Little is known about the characteristics of infectious endocarditis (IE) in cancer patients, although their risk may be higher and their presentation non-specific.

**Purpose:** This study sought to assess the prevalence of cancer in patients with IE in the EURO-ENDO registry and to determine their baseline characteristics, management, outcomes in comparison to cancer-free patients with IE.

**Methods:** Data were collected from a prospective cohort of 3085 adult patients enrolled in 40 countries between January 2016 and March 2018 with a diagnosis of IE based on the ESC 2015 diagnostic criteria. Clinical, biological, microbiological and echocardiographic findings, use of other imaging techniques, medical therapy, complications, theoretical indications for surgery, in-hospital mortality, and 1-year mortality were analysed in IE patients with and without cancer.

**Results:** 359 (11.6%) cancer patients with IE were identified and compared with 2726 IE patients without cancer. IE was community-acquired in 225/361 (74.8%), and more often nosocomial (18.6%) in healthcare associated cases. IE was native in 209 (60.4%), prosthetic in 97 (28%) and device-related in 30 (8.7%) patients. Microorganisms involved were Enterococci in 72/303 (23.8%), methicillin-sensitive Staphylococci in 63/303 (20.8%), and Streptococcus gallolyticus in 33/303 (10.9%) patients. IE cancer patients received more long-term cortico-therapy and immunosuppressive treatment compared to cancer free IE patients (9.1% vs. 3.9%,

$P < 0.0001$  and 11.7% vs. 2.7%,  $P < 0.0001$ , respectively). Acute renal failure was the most frequent complication, observed in 25.9% of patients, followed by embolic events (21.7%). Congestive heart failure and cardiogenic shock occurred more frequently in cancer patients (18.1% vs. 13.4%,  $P = 0.016$ ; 10.1% vs. 6.3%,  $P = 0.011$ , respectively).

Cancer IE patients were more frequently treated with amoxicillin (35.8% vs. 26.3%;  $P = 0.0002$ ) and daptomycin (15.2% vs. 10.6%;  $P = 0.0096$ ), but less frequently treated with vancomycin (34.6% vs. 44.9%,  $P = 0.0003$ ). According to the ESC guidelines, theoretical indication for cardiac surgery was not significantly different between groups (65.5% vs. 69.8%,  $P = 0.091$ ), but was effectively less performed when indicated in cancer IE patients during hospitalisation (65.5% vs. 75.0%,  $P = 0.0018$ ).

Compared to cancer-free IE patients, in-hospital and 1-year death occurred in 23.4% vs. 16.1%,  $P = 0.006$ , and 35.7% vs. 23.1%,  $P < 0.001$ , respectively. Predictors of mortality by multivariate analysis were creatinine  $> 2$  mg/dL, congestive heart failure and unperformed cardiac surgery (when indicated).

**Conclusion:** We report the largest contemporary series of patients with IE and cancer. The prevalence of cancer in IE patients is common and associated with a worse outcome. Patients with IE and cancer have different clinical characteristics than the general population and should require a specific management.
